# Supplementary material for: Structural Changes Observed in the Piriform Cortex in a Rat Model of Pre-motor Parkinson’s Disease
Source: PubMed Central journal article supplement (PMC6296349; doi:10.3389/fncel.2018.00479), 2018-12-10

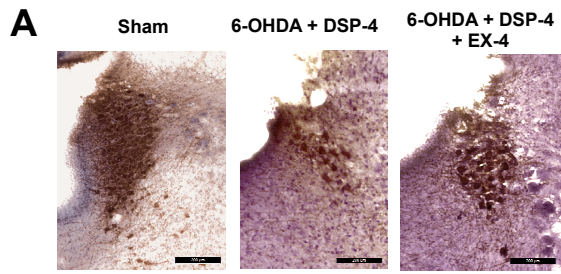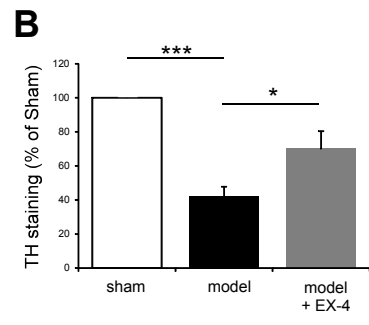

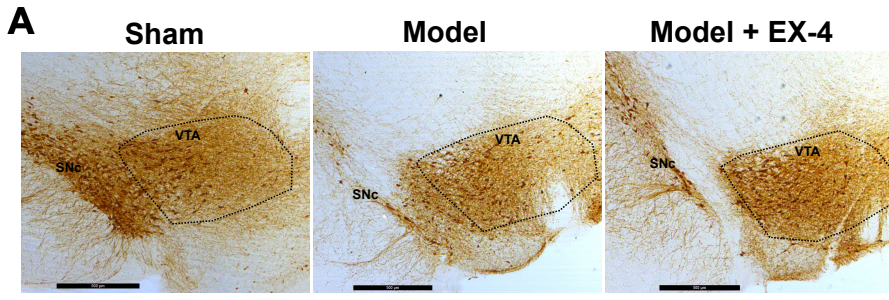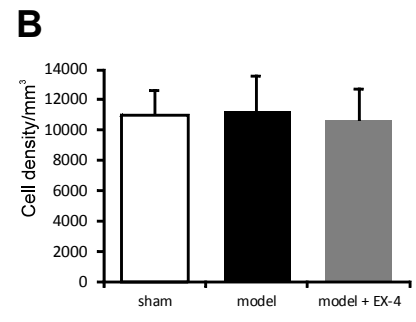

8 days

19 days

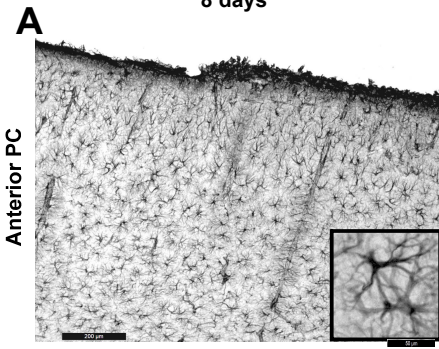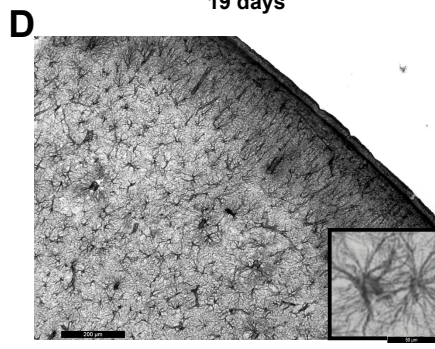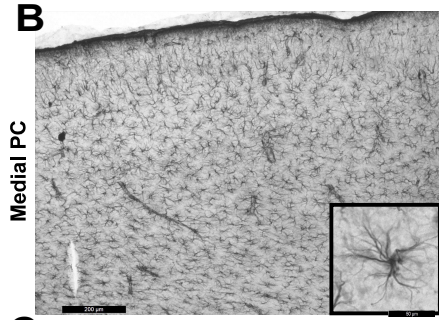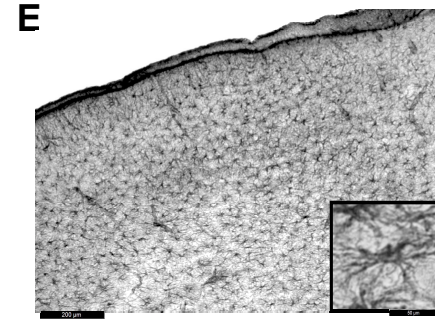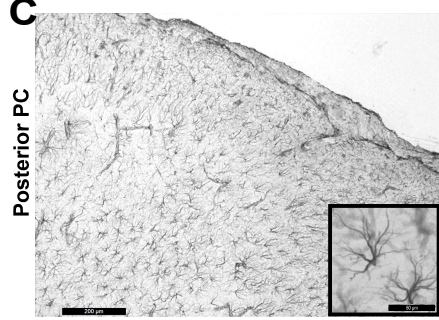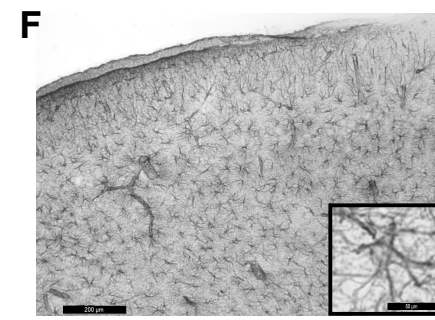

Model + EX-4 + EX9-39

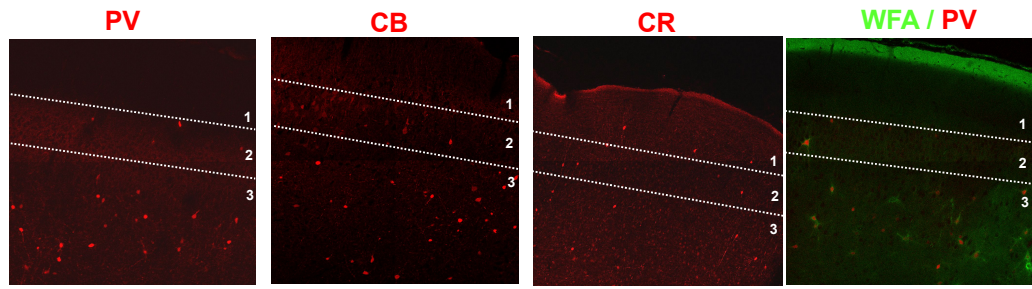

**A**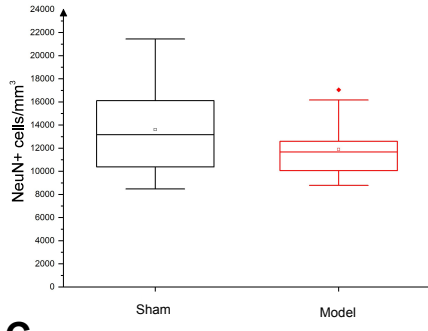**B**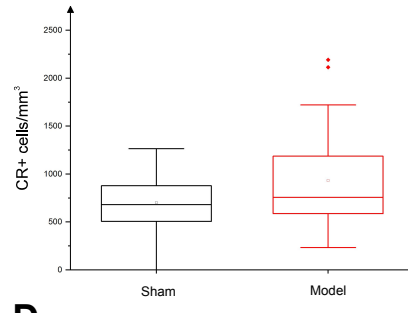**C**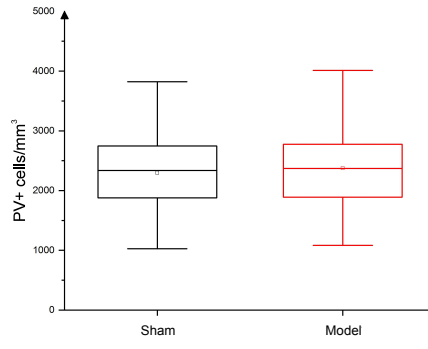**D**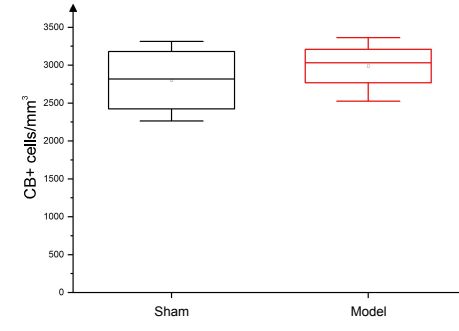

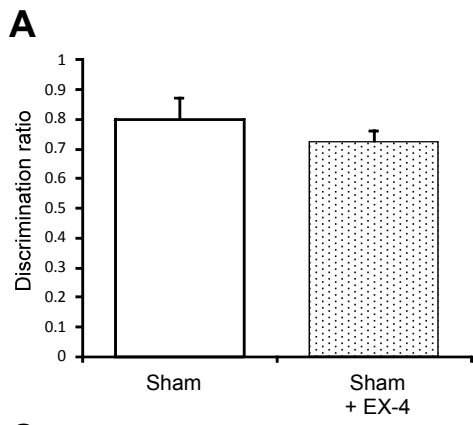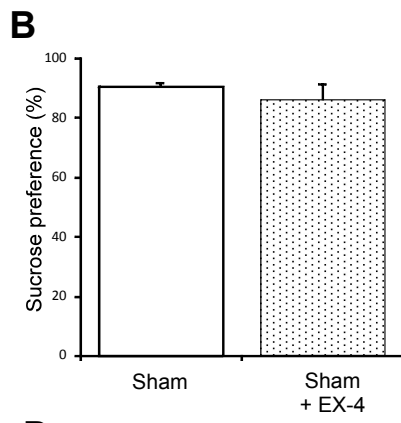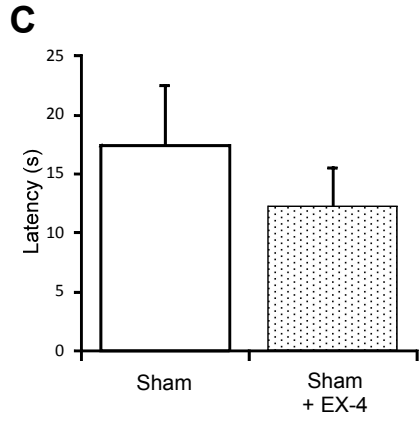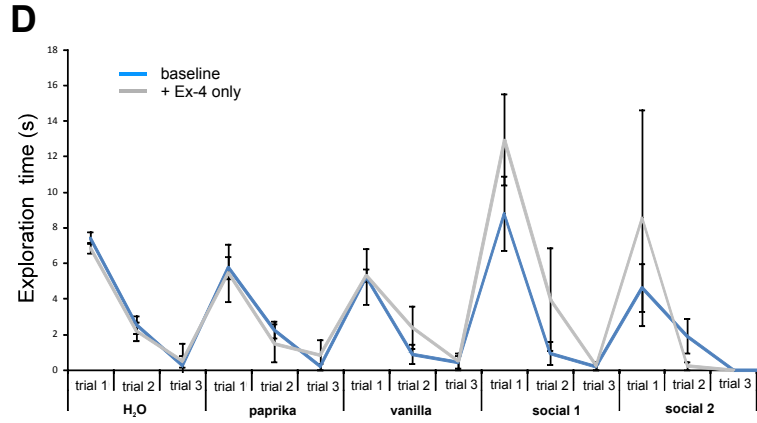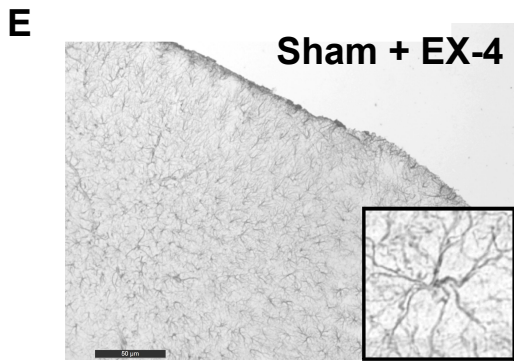

Supplement: Data_Sheet_1.pdf [file Data_Sheet_1.pdf]
